# Supplementary material for: Sulfidation and NaOH etching in CoFeAl LDH evolved catalysts for an efficient overall water splitting in an alkaline solution
Source: Royal Society of Chemistry journal article supplement (doi:10.1039/d3nr01276j), 2023-01-01
Supplement: d3nr01276j1.pdf [file d3nr01276j1.pdf]

## Supporting information

# **Sulfidation and NaOH etching on CoFeAl LDH evolved catalysts for efficient overall water splitting in alkaline solution**

Xiaolong Deng<sup>a,\*</sup>, Shanshan Wang<sup>a</sup>, Yi Liu<sup>a</sup>, Jiafeng Cao<sup>a,\*</sup>, Jinzhao Huang<sup>b,\*</sup>,  
Xingwei Shi<sup>c</sup>

<sup>a</sup>School of Microelectronics and Data Science & Institute of Optoelectronics and New Energy, Anhui University of Technology, Ma'anshan 243032, Anhui Province, P. R. China

<sup>b</sup>School of Physics and Technology, University of Jinan, Jinan 250022, Shandong Province, P. R. China

<sup>c</sup>Beijing Key Laboratory of Ionic Liquids Clean Process, CAS Key Laboratory of Green Process and Engineering, Institute of Process Engineering, Chinese Academy of Sciences, Beijing 100190, China

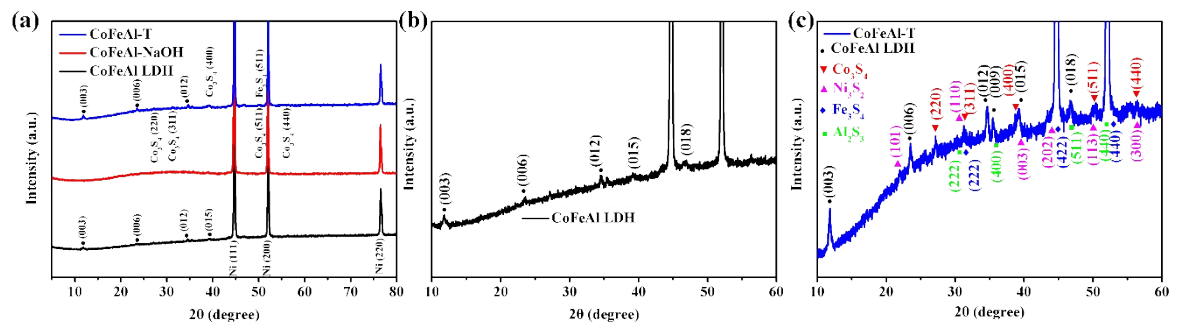

**Fig. S11.** (a) XRD patterns of the as-prepared samples: CoFeAl LDH, CoFeAl-NaOH and CoFeAl-T, and the magnified XRD pattern of (b) CoFeAl LDH and (c) CoFeAl-T.

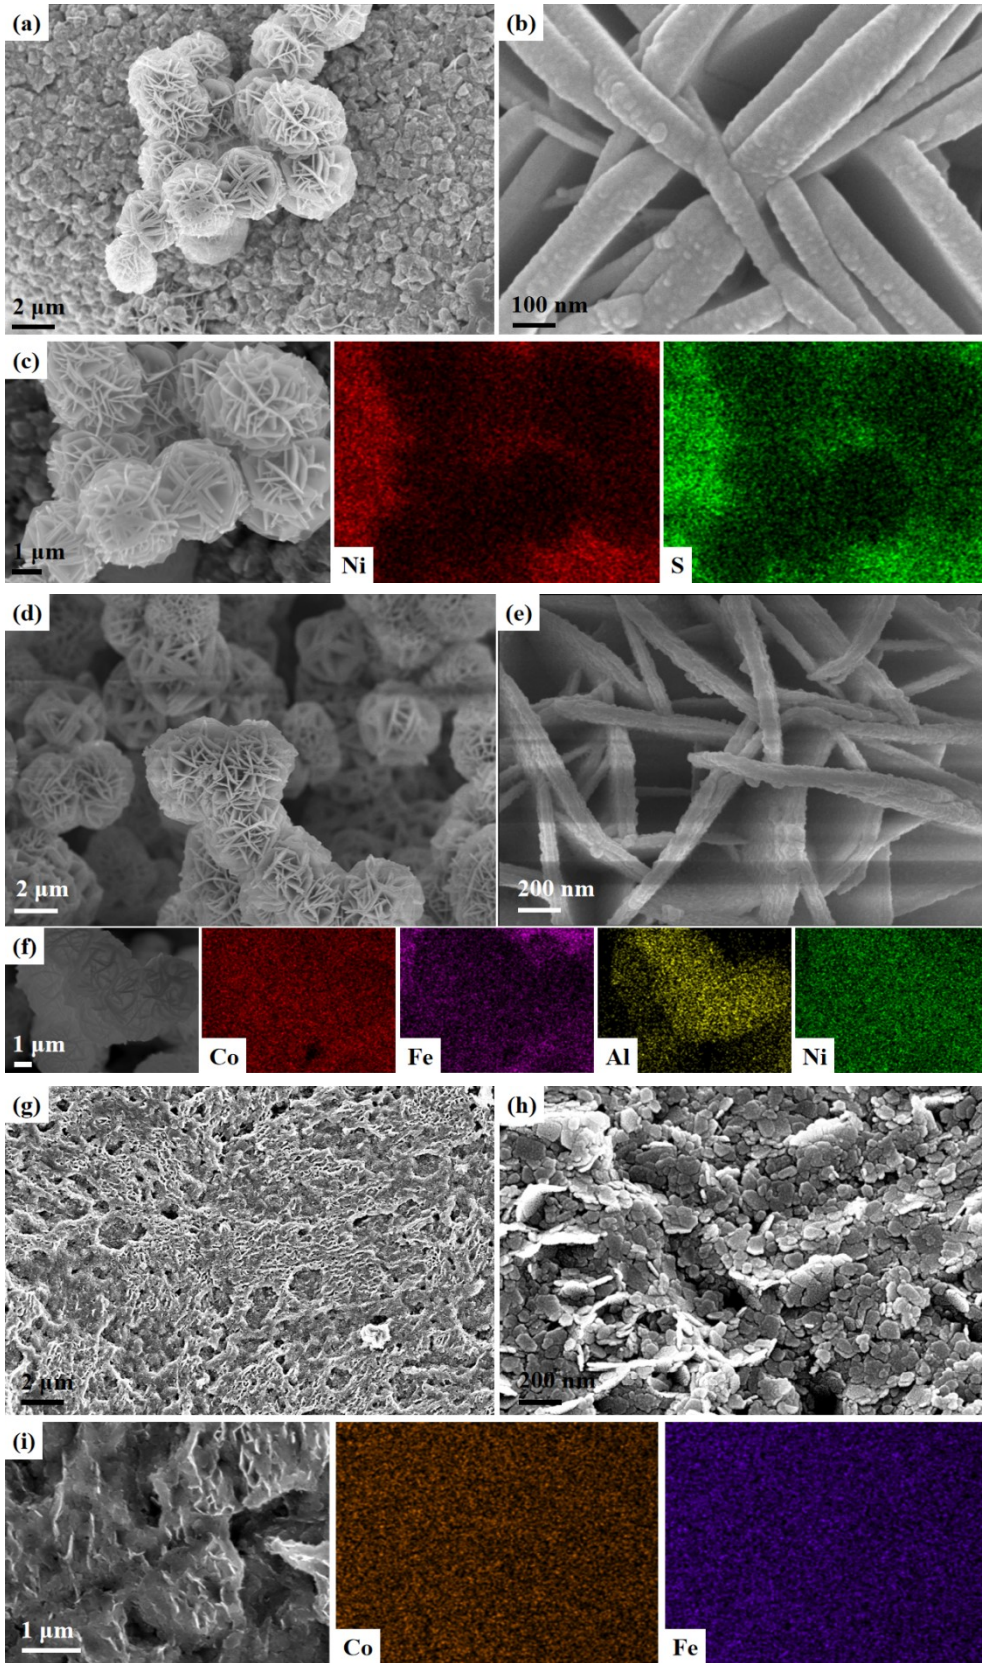

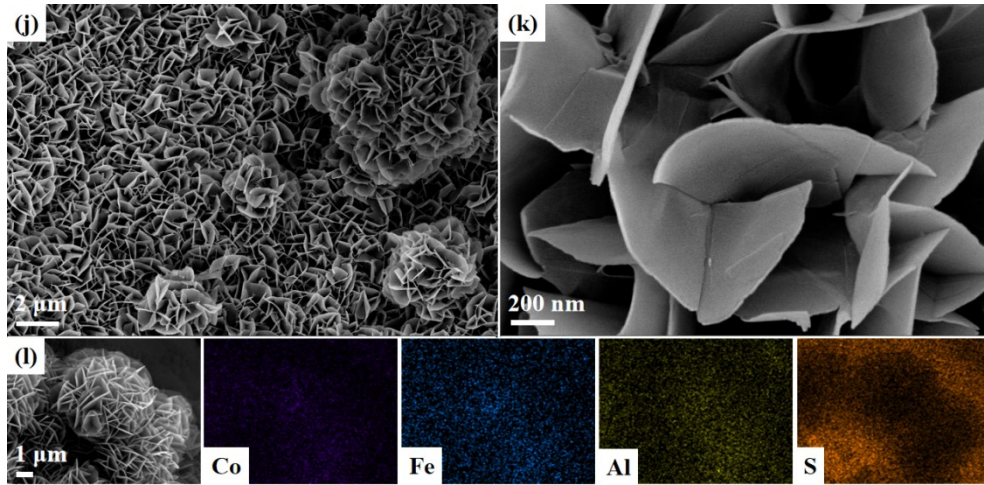

**Fig. S12.** SEM images and corresponding elemental mapping images of the as-prepared samples: (a-c) Ni foam-T, (d-f) CoFeAl LDH, (g-i) CoFeAl-NaOH and (j-l) CoFeAl-T.

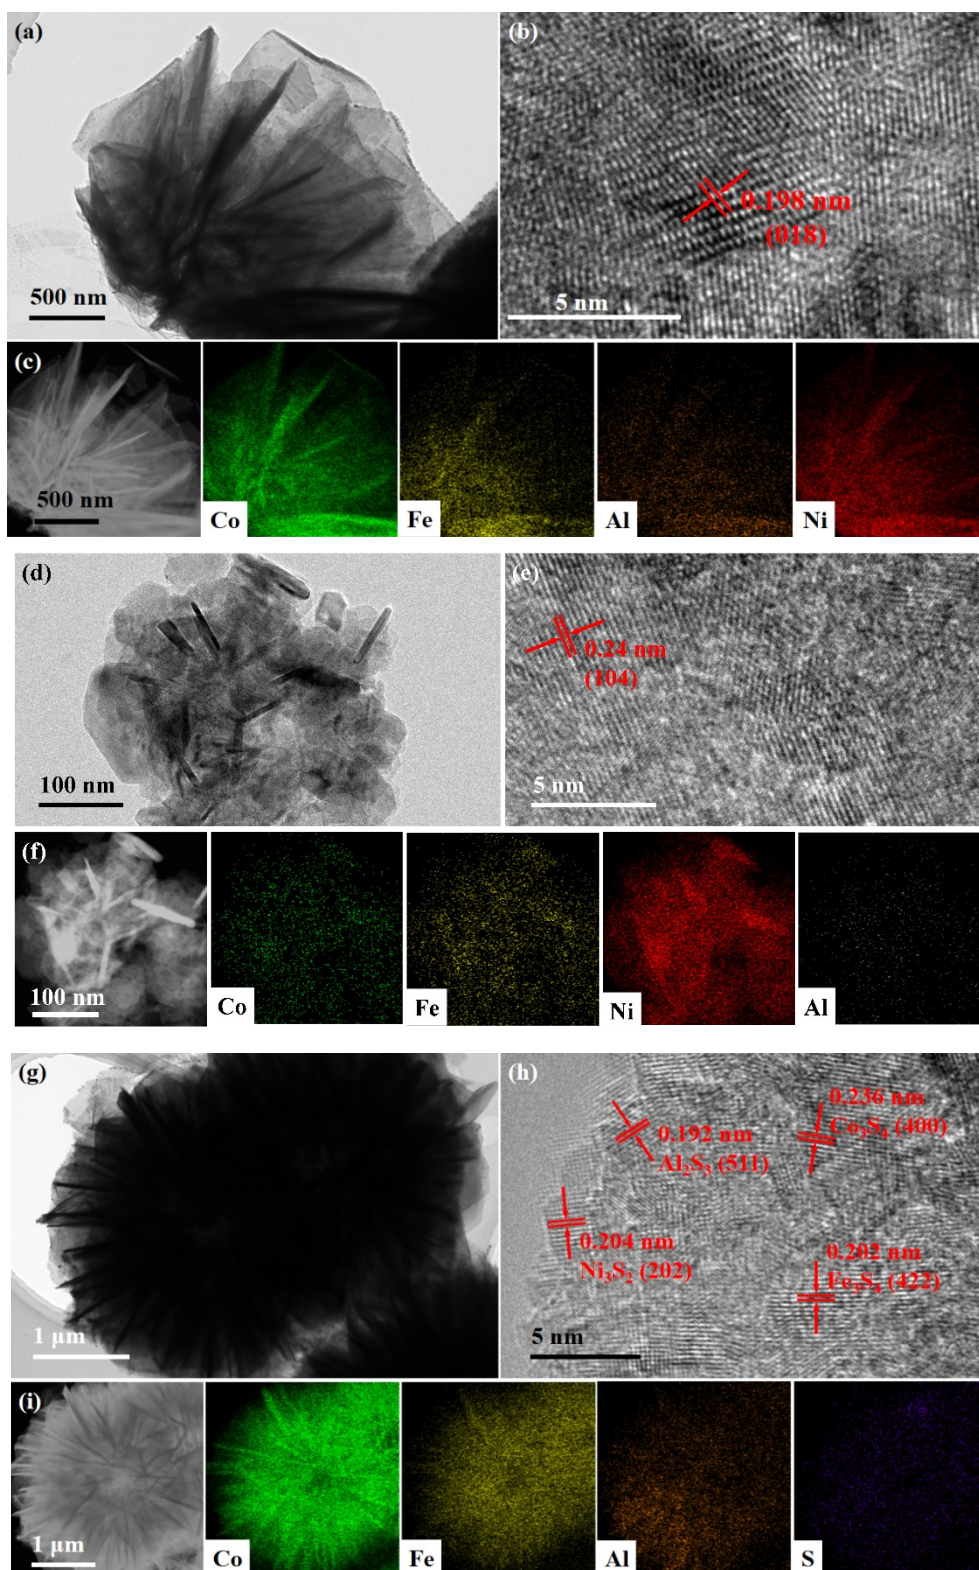

**Fig. SI3.** TEM image, HRTEM image and corresponding elemental mapping images of the as-prepared samples: (a-c) CoFeAl LDH, (d-f) CoFeAl-NaOH and (g-i) CoFeAl-T.

**Table S11** The content of Al in the different catalysts by molar ratio of Fe/Al

| Samples | CoFeAl LDH | CoFeAl-T | CoFeAl-NaOH | CoFeAl-T-NaOH | CoFeAl-NaOH-T |
|---------|------------|----------|-------------|---------------|---------------|
| Fe/Al   | 3.9        | 2.9      | 6.1         | 12.7          | 638.6         |

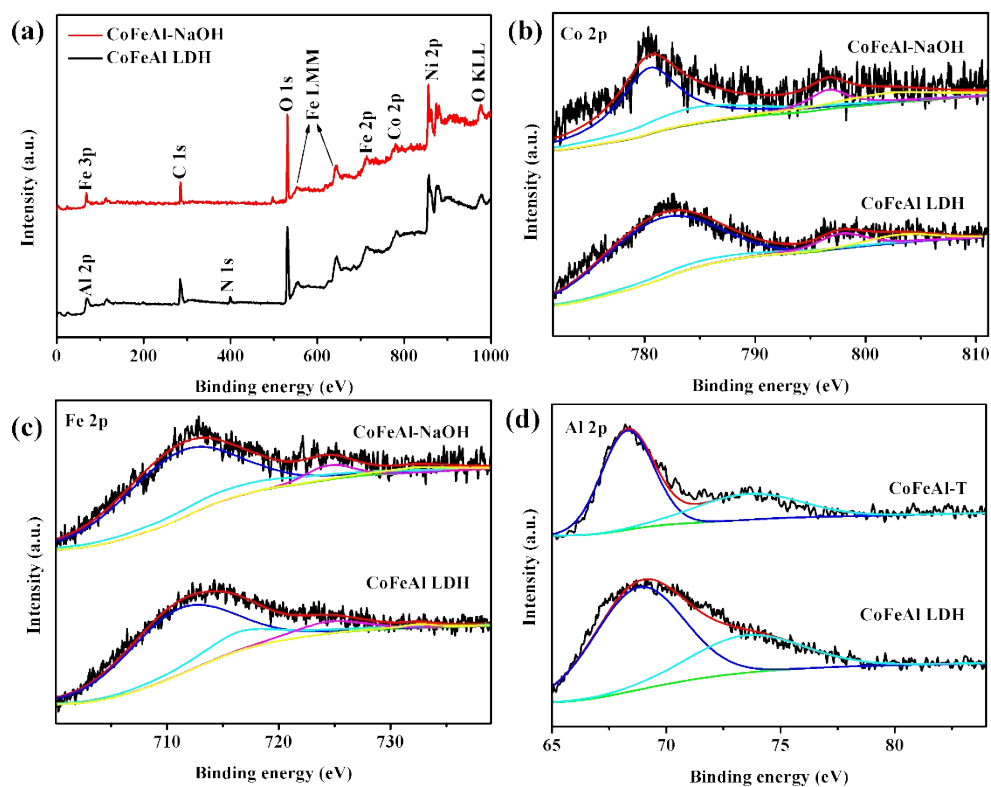

**Fig. S14.** XPS analysis of the as-prepared samples: XPS survey spectra (a) High-resolution spectra of (b) Co 2p, Fe 2p (c) and Al 2p (d).

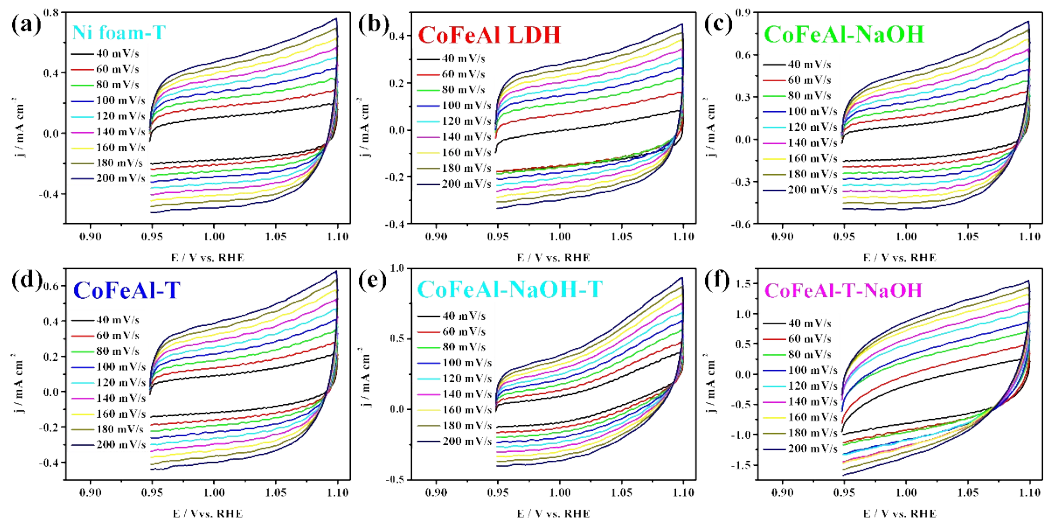

**Fig. SI5.** CV records with the bias range of 0.948-1.1 V (vs. RHE) in 1.0 M KOH by the scan rates of 40, 60, 80, 100, 120, 140, 160, 180, and 200  $\text{mV s}^{-1}$  for evaluating the ECSA.

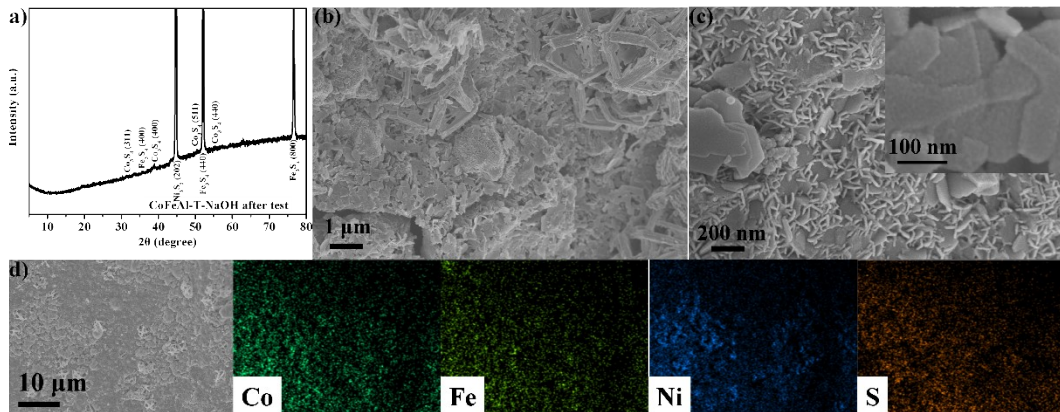

**Fig. SI6.** XRD pattern, and SEM image and corresponding elemental mapping image, of CoFeAl-T-NaOH after long-term stability test.

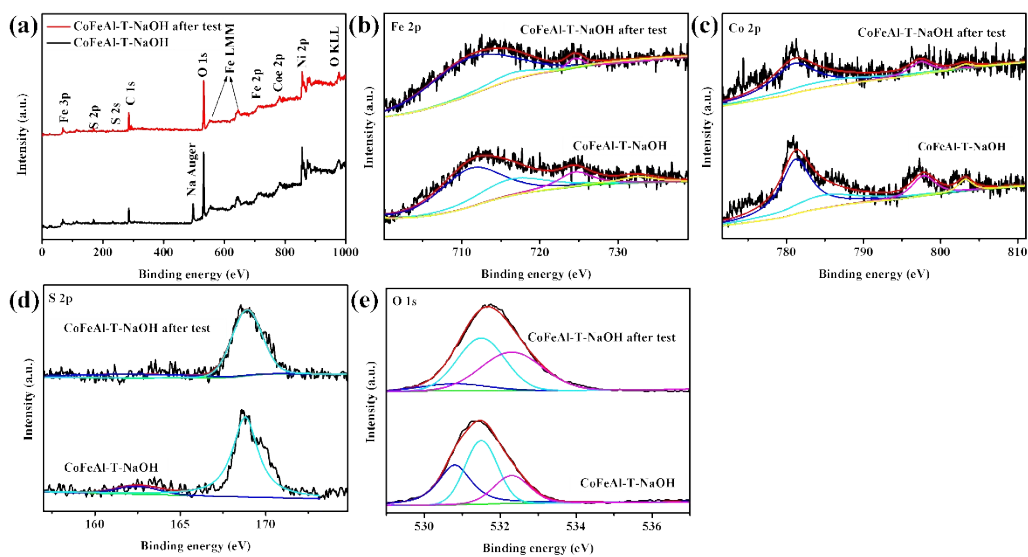

**Fig. SI7.** XPS spectra of CoFeAl-T-NaOH before and after long-term stability test.

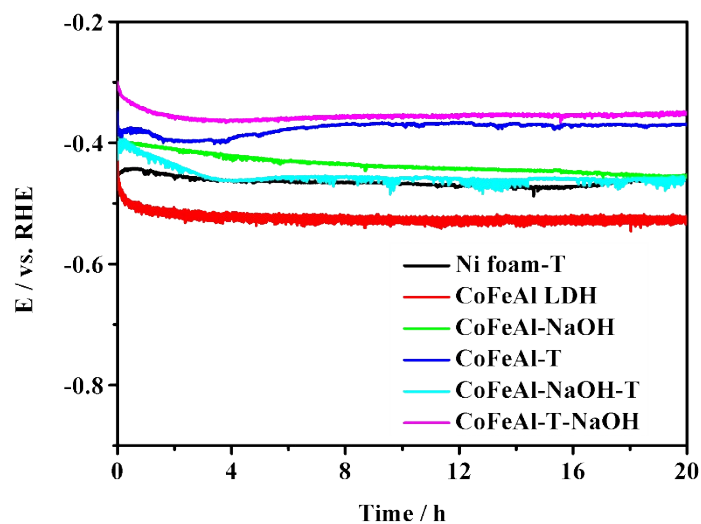

**Fig. SI8.** Chronopotentiometric curves of the as-prepared samples for HER measured at the current density of  $150 \text{ mA cm}^{-2}$  for 20 hours.



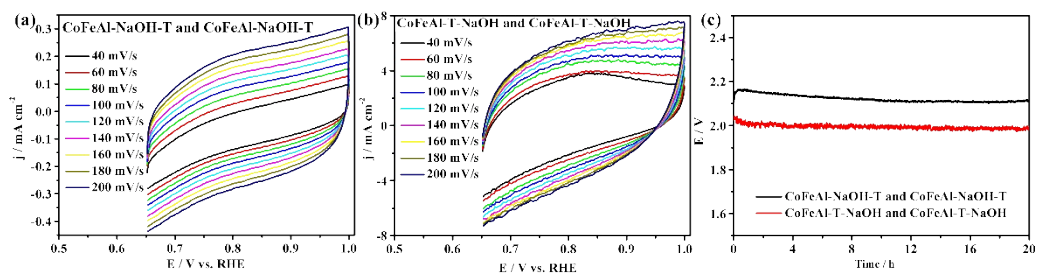

**Fig. S19.** (a,b) CV with a bias range of 0.652-1 V (vs. RHE) was recorded, and scan rates of 40, 60, 80, 100, 120, 140, 160, 180, and 200 mV s<sup>-1</sup> were used to evaluate ECSA. (c) Chronopotentiometric curves measured at the current density of 100 mA/cm<sup>2</sup> for 20 hours.
